# Supplementary material
Source: MDPI journal article supplement (https://www.mdpi.com/2071-1050/16/1/218)
Supplement: s1 [file s1]

## Supplementary information document

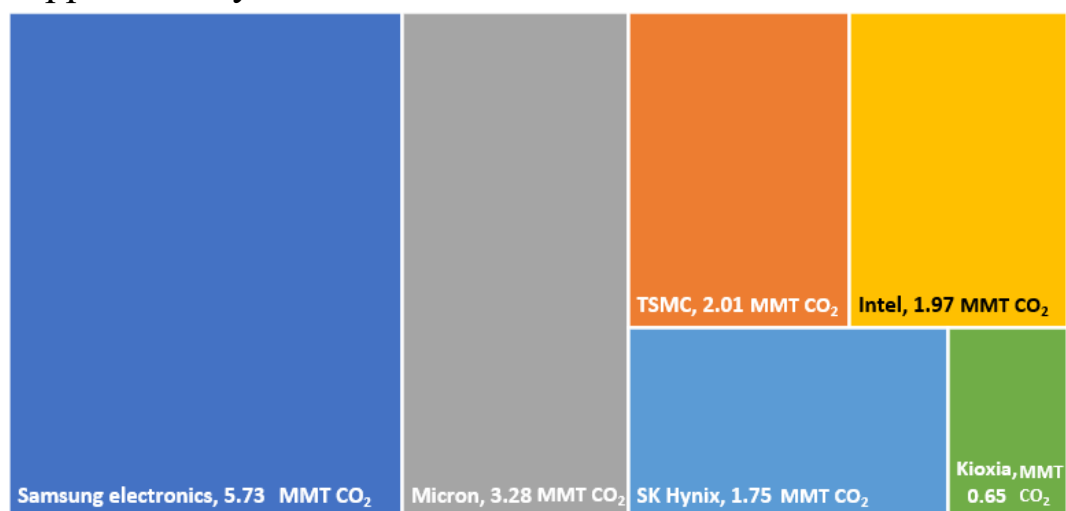

Figure S1. Scope 1 CO<sub>2</sub> emissions of the six companies in 2020.

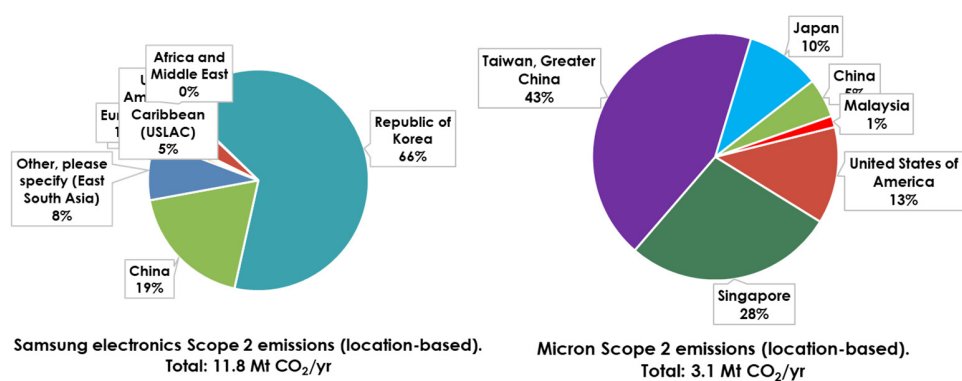

Figure S2. Location-based scope 2 emissions of Micron and Samsung Electronics in 2020.

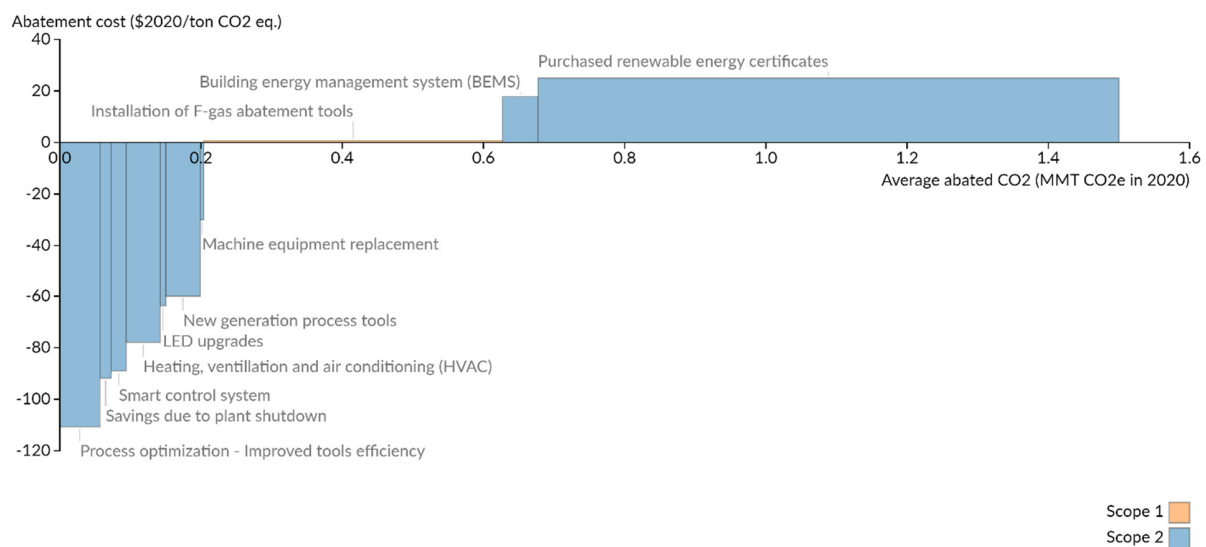

Figure S3. MACC for TSMC in 2020.

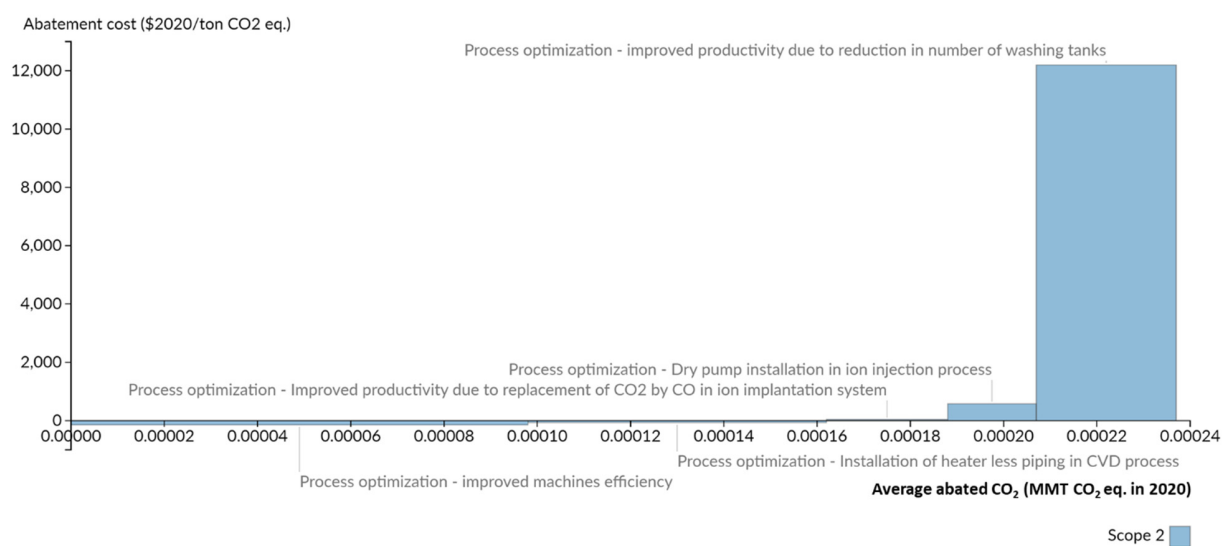

Figure S4. MACC for Kioxia in 2020.

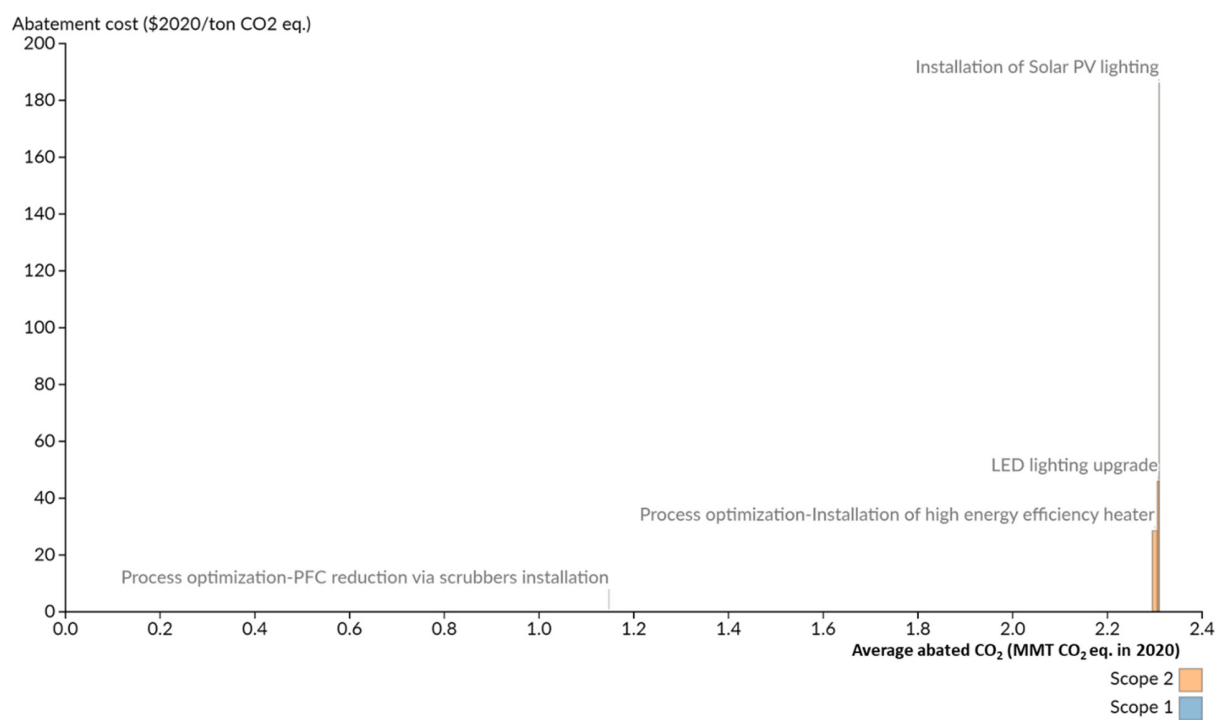

Figure S5. MACC for SK Hynix in 2020.
